# Supplementary material
Source: ML conference proceedings conference paper supplement (https://openreview.net/forum?id=WMxXuVTzFm)
Supplement: supplementary_material [file attachment]

# **MASK2TASKS: LEVERAGING SEGMENTATION TO ENHANCE CLASSIFICATION PERFORMANCE IN HISTOPATHOLOGICAL COLORECTAL IMAGES**

## **ABSTRACT**

In this paper, we introduced Mask2Tasks, a multi-task learning architecture for colorectal image classification and segmentation, and explored a two-stage training strategy. Through experimentation, we showed that our approach outperforms individual task models and the conventional uniform weighted multi-task learning approach.

Link to Download Code:

<https://1drv.ms/f/s!An0iqfp6C3ewgSc2TiTomFatqy6c>
